# Supplementary material for: Clinical and laboratory phenotypes in juvenile-onset Systemic Lupus Erythematosus across ethnicities in the UK
Source: PubMed Central journal article supplement — Lupus. 2021 Jan 7;30(4):597–607. doi: 10.1177/0961203320984251 (PMC7967896; doi:10.1177/0961203320984251), 2021-01-07
Supplement: sj-pdf-1-lup-10.1177_0961203320984251.pdf [file sj-pdf-1-lup-10.1177_0961203320984251.pdf]

**Supplement Table 1:  
Patient demographics**

| <b>Item</b>                          | <b>Asian</b>                         | <b>Black African/<br/>Caribbean</b> | <b>White<br/>Caucasian</b>           | <b>P value</b>                                            |
|--------------------------------------|--------------------------------------|-------------------------------------|--------------------------------------|-----------------------------------------------------------|
| <b>Number of individuals</b>         | 134/422<br>(31.8%)                   | 69/422<br>(16.4%)                   | 219/422<br>(51.9%)                   | -                                                         |
| <b>Female sex</b>                    | <b>101/134</b><br><b>(75.4%)</b>     | <b>63/69</b><br><b>(91.3%)</b>      | <b>191/219</b><br><b>(87.2%)</b>     | <b>0.003</b><br>(C vs A =<br>0.006;<br>B vs A =<br>0.008) |
| <b>Age at diagnosis<br/>(years)*</b> | <b>13.02</b><br><b>[10.71-14.58]</b> | <b>12.34</b><br><b>[9.43-13.72]</b> | <b>13.06</b><br><b>[11.00-14.92]</b> | <b>0.026</b><br>(B vs C =<br>0.021)                       |
| <b>Time to diagnosis<br/>(years)</b> | <b>0.26</b><br><b>[0.00-14.07]</b>   | <b>0.27</b><br><b>[0.00-14.00]</b>  | <b>0.37</b><br><b>[0.00-14.50]</b>   | <b>0.040</b><br>(C vs A =<br>0.049)                       |

Age of diagnosis is presented as medians with interquartile ranges. Time to diagnosis is presented as medians with ranges. P values relate to Kruskal Wallace and Chi-squared tests, comparing distribution and counts across the three ethnic groups. Results of post-hoc pairwise comparison tests (Dunn's and Fisher's Exact test) are indicated in curved brackets under the p value, indicating where the significant differences lie using the following codes: A= Asian, B= Black African/Caribbean, C= White Caucasian. \*Diagnosis age was not available for one patient.

**Supplement Table 2: Damage at diagnosis (SLICC)**

| Item                                         | Asian<br>(n=134) | Black African/<br>Caribbean (n=69) | White<br>Caucasian<br>(n=219) | P value |
|----------------------------------------------|------------------|------------------------------------|-------------------------------|---------|
| SLICC-SDI                                    | 0 [0]            | 0 [0]                              | 0 [0]                         | 0.522   |
| <b>SLICC domain involvement at diagnosis</b> |                  |                                    |                               |         |
| • Cataract                                   | 1 (0.7%)         | 0 (0%)                             | 0 (0%)                        | 0.481   |
| • Retinal change                             | 2 (1.5%)         | 0 (0%)                             | 1 (0.5%)                      | 0.580   |
| • Cognitive                                  | 3 (2.2%)         | 2 (2.9%)                           | 4 (1.8%)                      | 0.817   |
| • Proteinuria                                | 4 (3.0%)         | 1 (1.5%)                           | 8 (3.7%)                      | 0.651   |
| • Pericarditis                               | 0 (0%)           | 0 (0%)                             | 1 (0.5%)                      | 1.00    |
| • Thrombosis                                 | 0 (0%)           | 0 (0%)                             | 2 (0.9%)                      | 1.00    |
| • Muscle atrophy                             | 2 (1.5%)         | 1 (1.5%)                           | 6 (2.7%)                      | 0.899   |
| • Alopecia                                   | 11 (8.2%)        | 2 (2.9%)                           | 11 (5.0%)                     | 0.250   |
| • Gonadal failure                            | 1 (0.7%)         | 1 (1.5%)                           | 0 (0%)                        | 0.231   |

Total SLICC-SDI values are presented as medians with interquartile ranges. Individual damage items are presented as a number with a percentage in the brackets.

**Supplement table 3: Significant results in jSLE patients who tested positive for ANA at diagnosis**

| Item                                                 | Asian<br>(n=129)             | Black African/<br>Caribbean<br>(n=67) | White<br>Caucasian<br>(n=202) | P value                                                       |
|------------------------------------------------------|------------------------------|---------------------------------------|-------------------------------|---------------------------------------------------------------|
| <b>Age at diagnosis (years)</b>                      | <b>13.12 [10.81 - 14.65]</b> | <b>12.36 [9.50- 13.88]</b>            | <b>13.10 [11.18- 14.92]</b>   | <b>0.024</b><br><i>(B vs C = 0.020)</i>                       |
| <b>SLEDAI score at diagnosis</b>                     | <b>8.00 [5.00- 14.00]</b>    | <b>7.00 [2.00- 10.00]</b>             | <b>12.00 [6.00- 18.00]</b>    | <b>&lt;0.001</b><br><i>(B vs C &lt;0.001; A vs B = 0.020)</i> |
| <b>Total numerical pBILAG2004 score at diagnosis</b> | <b>8.00 [3.50- 17.00]</b>    | <b>5.00 [1.00- 12.00]</b>             | <b>9.00 [4.00- 16.00]</b>     | <b>0.033</b><br><i>(B vs C = 0.043)</i>                       |
| <b>Constitutional pBILAG2004 at diagnosis</b>        | <b>50 (38.9%)</b>            | <b>13 (19.4%)</b>                     | <b>58 (28.7%)</b>             | <b>0.015</b><br><i>(A vs B = 0.006)</i>                       |
| <b>Mucocutaneous pBILAG2004 at diagnosis</b>         | <b>61 (47.3%)</b>            | <b>18 (26.9%)</b>                     | <b>78 (38.6%)</b>             | <b>0.020</b><br><i>(A vs B = 0.006)</i>                       |
| <b>Musculoskeletal pBILAG2004 at diagnosis</b>       | <b>34 (26.4%)</b>            | <b>14 (20.9%)</b>                     | <b>78 (38.6%)</b>             | <b>0.008</b><br><i>(B vs C = 0.008)</i>                       |
| <b>ESR (mm/hr) at diagnosis</b>                      | <b>42.00 [15.00- 86.00]</b>  | <b>45.50 [23.00- 100.5]</b>           | <b>30.00 [11.00- 70.00]</b>   | <b>0.033</b>                                                  |
| <b>Haemoglobin</b>                                   | <b>12.50 [11.60-</b>         | <b>11.80 [9.80-</b>                   | <b>13.08 [12.10-</b>          | <b>&lt;0.001</b>                                              |

|                                         |                                  |                                   |                                 |                                                                  |
|-----------------------------------------|----------------------------------|-----------------------------------|---------------------------------|------------------------------------------------------------------|
| <b><i>(g/dl) at last visit</i></b>      | <b><i>13.58]</i></b>             | <b><i>13.00]</i></b>              | <b><i>14.20]</i></b>            | <b><i>(A vs B = 0.037; B vs C &lt;0.001; A vs C = 0.021)</i></b> |
| <b><i>ESR (mm/hr) at last visit</i></b> | <b><i>12.00 [6.00-28.50]</i></b> | <b><i>19.00 [10.00-42.75]</i></b> | <b><i>7.50 [3.00-19.00]</i></b> | <b><i>&lt;0.001 (A vs C = 0.028; B vs C &lt;0.001)</i></b>       |

Variables are presented as medians with interquartile ranges, apart from individual pBILAG2004 components, which are presented as numbers and percentages. P values relate to Kruskal Wallace and Chi-squared tests, comparing distribution and counts across the three ethnic groups. Results of post-hoc pairwise comparison tests (Dunn's and Fisher's Exact test) are indicated in curved brackets under the p value, indicating where the significant differences lie using the following codes: A= Asian, B= Black African/Caribbean, C=White Caucasian. \*Diagnosis age was not available for one patient.
